# Supplementary material for: Immunometabolic Markers in a Small Patient Cohort Undergoing Immunotherapy
Source: MDPI journal article supplement (doi:10.3390/biom12050716), 2022-05-18
Supplement: s1 [file s1]

**Table Supplemental Data S3.1:** Leukocytes and lymphocyte subsets.  $p > 0.05$ .

**A**

| immune subset<br>(absolute counts) | standard value  | responder           | non-responder         |
|------------------------------------|-----------------|---------------------|-----------------------|
| neutrophils                        | (1.56-6.13 /nl) | 4.45/nl (+/- 1.2)   | 4.00/nl (+/- 2.50)    |
| eosinophils                        | (0.04-0.36 /nl) | 0.16/nl (+/- 0.09)  | 0.14/nl (+/- 0.11)    |
| monocytes                          | (0.24-0.36 /nl) | 0.56/nl (0.44/0.71) | 0.5/nl (0.38/0.64)    |
| platelets                          | (182-369 /nl)   | 274 /nl (+/- 76.6)  | 229.3 /nl (+/- 114.5) |

**B**

| immune subset   | % from population       | responder            | non-responder       |
|-----------------|-------------------------|----------------------|---------------------|
| granulocytes    | CD15 from Leukocytes    | 60.39 % (+/- 23.4)   | 73.34 % (+/- 13.2)  |
| monocytes       | CD14 from Leukocytes    | 3.19 % (1.96/5.08)   | 6.21 % (2.99/9.03)  |
| lymphocytes     | FSC/SSC from Leukocytes | 21.95 % (9.59/41.23) | 9.53 % (5.81/12.40) |
| T cells         | CD3 from Lymphocytes    | 67.91 % (+/- 13.04)  | 63.99 % (+/- 11.91) |
| B cells         | CD19 from Lymphocytes   | 6.91 % (+/- 5.11)    | 4.823 % (+/- 2.73)  |
| CD123+BDCA2+pDC | pDC from lymphocytes    | 0.04 % (0.02/0.06)   | 0.04 % (0.02/0.06)  |
| NK cells        | CD56 from Lymphocytes   | 21.66 % (+/- 9.99)   | 25.53 % (+/- 12.25) |

**C**

| T cell subsets | % from population  | responder           | non-responder        |
|----------------|--------------------|---------------------|----------------------|
| PD-1+          | % from T Cells     | 12.4 % (3.07/23.3)  | 8.46 % (5.31/14.6)   |
| PD-L1+         | % from T Cells     | 0.16 % (0.11/0.49)  | 0.34 % (0.11/0.46)   |
| LAG-3+         | % from T Cells     | 0.07 % (+/- 0.03)   | 0.16 % (+/- 0.14)    |
| BTLA+          | % from T Cells     | 54.72 % (+/- 23.2)  | 44.81 % (+/- 19)     |
| CD244+         | % from T Cells     | 17.80 % (10/34.5)   | 11.35 % (5.91/31.7)  |
| TIM-3+         | % from T Cells     | 0.46 % (0.29/0.96)  | 0.56 % (0.16/0.9)    |
| CD3+/CD4+      | % from Lymphocytes | 47.06 % (+/- 13.37) | 37.93 % (+/- 13.84)  |
| CD3+/CD8+      | % from Lymphocytes | 13.3 % (9.84/27.68) | 20.06 % (13.4/30.53) |
| CD3+/CD69+     | % from Lymphocytes | 1.01 % (0.24/1.45)  | 1.04 % (0.73/2.04)   |
| CD3+/CD25+     | % from Lymphocytes | 2.76 % (+/- 1.55)   | 3.68 % (+/- 2.76)    |
| CD3+/CD127+    | % from Lymphocytes | 30.36 % (+/- 16.44) | 16.22 % (+/- 14.68)  |
| CD25+/CD127-   | % from T Cells     | 2.29 % (+/- 1.81)   | 4.8 % (+/- 3.7)      |

**D**

| <b>B cell subsets</b> | <b>% from population</b> | <b>responder</b>    | <b>non-responder</b> |
|-----------------------|--------------------------|---------------------|----------------------|
| PD-1+                 | % from B Cells           | 0.38 % (0/1.78)     | 1.57 % (0.52/1.92)   |
| PD-L1+                | % from B Cells           | 3.07 % (+/- 1.41)   | 4.24 % (+/- 2.13)    |
| LAG-3+                | % from B Cells           | 0.17 % (0.13/0.4)   | 0.3 % (0.04/1.62)    |
| BTLA+                 | % from B Cells           | 99.7 % (99.2/99.9)  | 99.4 % (97.3/99.6)   |
| CD244+                | % from B Cells           | 1.55 % (0.72/2.96)  | 1.59 % (0.66/3.29)   |
| CD27+/CD24+           | % from B Cells           | 8.71 % (2.96/17.2)  | 7.31 % (1.68/13.03)  |
| CD27+/CD38+           | % from B Cells           | 2.22 % (1.23/3.89)  | 2.64 % (1.77/6.97)   |
| IgD+                  | % from B Cells           | 84.9 % (77.1/89.3)  | 83.3 % (53.85/90.38) |
| IgM+                  | % from B Cells           | 41.1 % (+/- 26.35)  | 34.33 % (+/- 20.92)  |
| IgD+/IgM+             | % from B Cells           | 37.76 % (+/- 24.33) | 30.52 % (+/- 19.28)  |

**E**

| <b>NK cell subsets</b> | <b>% from population</b> | <b>responder</b>   | <b>non-responder</b>  |
|------------------------|--------------------------|--------------------|-----------------------|
| PD-1+                  | % from NK Cells          | 0.82 % (0/4.02)    | 1.65 % (1.34/2.13)    |
| PD-L1+                 | % from NK Cells          | 0.52 % (0.24/0.64) | 0.46 % (0.31/2.23)    |
| LAG-3+                 | % from NK Cells          | 0.35 % (0.18/0.49) | 0.5 % (0.31/0.82)     |
| BTLA+                  | % from NK Cells          | 5.66 % (4/13.95)   | 3.58 % (2.45/9.26 )   |
| CD244+                 | % from NK Cells          | 94.4 % (90.4/97.6) | 93.8 % (84.63/95.38)  |
| CD56 high+             | % from NK Cells          | 4.56 % (2.79/10.5) | 6.57 % (3.69/13.16)   |
| CD3+/CD56+             | % from Lymphocytes       | 3.66 % (1.8/7.42)  | 2.00 % (0.98/6.96)    |
| CD16+                  | % from NK Cells          | 58.7 % (39.2/84.0) | 73.05 % (37.28/84.35) |

**A** Routine laboratory leukocyte subsets and platelets. **B** Relative leukocyte and lymphocyte subsets acquired by flow cytometry. **C** T cell subsets, activation markers and checkpoint markers. **D** B cell subsets and checkpoint markers. **E** NK cell subsets and checkpoint markers. Depending on normality tests the mean with standard deviation (+/-) or median with (25%/75%) percentile is shown.

**Supplemental Data S3.2: Myeloid subsets. p > 0.05.**

**A**

| <b>myeloid cell subsets</b> | <b>% from population</b> | <b>responder</b>   | <b>non-responder</b> |
|-----------------------------|--------------------------|--------------------|----------------------|
| PD-L1+                      | % from granulocytes      | 0.05 % (0.02/0.09) | 0.06 % (0.02/0.12)   |
| LAG-3+                      | % from granulocytes      | 0.02 % (0.01/0.03) | 0.02 % (0.01/0.05)   |
| BTLA+                       | % from granulocytes      | 0.1 % (0.03/0.38)  | 0.09 % (0.04/0.23)   |
| CD244+                      | % from granulocytes      | 0.77 % (0.27/0.88) | 0.73 % (0.26/1.15)   |
| HLA-DR+                     | % from granulocytes      | 0.55 % (0.21/0.91) | 0.26 % (0.10/0.89)   |

|         |                  |                    |                    |
|---------|------------------|--------------------|--------------------|
| PD-L1+  | % from monocytes | 0.48 % (0.3/1.8)   | 0.37 % (0.15/1.16) |
| LAG-3   | % from monocytes | 0.27 % (0.05/1.49) | 0.24 % (0.08/0.48) |
| BTLA    | % from monocytes | 0.52 % (0.13/2.58) | 0.35 % (0.10/1.42) |
| HLA-DR- | % from monocytes | 1.73 % (0.71/10)   | 3.22 % (1.32/7.92) |

## B

| myeloid markers and CD16 | % from population | responder          | non-responder       |
|--------------------------|-------------------|--------------------|---------------------|
| CD33+ CD11b+             | % from Leukocytes | 56.9 % (+/- 31.83) | 76.53 % (+/- 16.25) |
| CD33+ CD11b-             | % from Leukocytes | 0.44 % (0.16/0.78) | 0.31 % (0.16/0.99)  |
| CD33- CD11b+             | % from Leukocytes | 8.53 % (2.49/24.4) | 6.49 % (2.21/29.65) |
| HLA-DR+ CD16++           | % from Leukocytes | 0.84 % (+/- 0.63)  | 0.99 % (+/- 0.56)   |
| HLA-DR+ CD16-            | % from Leukocytes | 4.21 % (1.67/8.76) | 3.98 % (1.05/5.09)  |

**A** Checkpoint markers on myeloid cell subsets. **B** Populations with the myeloid markers CD33/CD11b and HLA-DR/CD16 were analysed considering the whole Leukocyte population. Depending on normality tests the mean with standard deviation (+/-) or median with (25%/75%) percentile is shown.

## Supplemental Data S3.3: Metabolic and hormonal markers. $p > 0.05$ .

| metabolic markers | standard value  | responder             | non-responder        |
|-------------------|-----------------|-----------------------|----------------------|
| VLDL              | (0-40 mg/dl)    | 35 mg/dl (26/41)      | 32 mg/dl (22/42)     |
| Lp(a)             | (<30 mg/dl)     | 21.4 mg/dl (10/76)    | 12.8 mg/dl (10/49)   |
| Triglycerides     | (<150 mg/dl)    | 132.5 mg/dl (113/184) | 128.5 mg/dl (90/168) |
| LDH               | (<250 U/l)      | 209 U/l (167/257)     | 181 U/l (167/206)    |
| Glucose           | (74-106 mg/dl)  | 97.5 mg/dl (88/120)   | 99 mg/dl (89/132)    |
| Vitamin D         | (75-250 nmol/l) | 61.89 nmol/l (+/-39)  | 41.8 mg/dl (+/-22)   |

| hormonal metabolites   | responder                | non-responder            |
|------------------------|--------------------------|--------------------------|
| Estradiol (E2) (males) | 0.14 nmol/l (0.11/0.16)  | 0.11 nmol/l (0.1/0.13)   |
| SHGB                   | 69.59 nmol/l (+/- 37.65) | 56.43 nmol/l (+/- 21.64) |
| Cortisol               | 12.9 µg/dl (+/- 4.55)    | 11.9 µg/dl (+/- 3.74)    |
| TSH                    | 1.32 U/l (0.89/2.65)     | 1.39 U/l (1.19/2.18)     |
| ft3                    | 2.57 ng/l (+/- 0.44)     | 2.59 ng/l (+/- 0.28)     |
| IGF-1                  | 111 ng/ml (95.05/145.5)  | 132 ng/ml (107/162.6)    |
| NT-proBNP              | 90.5 pg/ml (62.25/446.5) | 251 pg/ml (106.5/412.5)  |

Depending on normality tests the mean with standard deviation (+/-) or median with (25%/75%) percentile is shown.
